# Supplementary material for: A hierarchical and collaborative BRD4/CEBPD partnership governs vascular smooth muscle cell inflammation
Source: PubMed Central journal article supplement — Mol Ther Methods Clin Dev. 2021 Feb 27;21:54–66. doi: 10.1016/j.omtm.2021.02.021 (PMC7966960; doi:10.1016/j.omtm.2021.02.021), 2021-02-27
Supplement: mmc1.pdf [file mmc1.pdf]

**OMTM, Volume 21**

**Supplemental information**

**A hierarchical and collaborative**

**BRD4/CEBPD partnership governs**

**vascular smooth muscle cell inflammation**

**Qingwei Wang, Hatice Gulcin Ozer, Bowen Wang, Mengxue Zhang, Go Urabe, Yitao Huang, K. Craig Kent, and Lian-Wang Guo**

## Supplemental Tables

**Table S1.** Materials

| <b>Product</b>                             | <b>Manufacturer</b> | <b>Catalog Number</b> |
|--------------------------------------------|---------------------|-----------------------|
| Protein A/G Magnetic Beads                 | Thermo Fisher       | 88802                 |
| RNAi Max                                   | Invitrogen          | 13778150              |
| Protease inhibitor cocktail                | Thermo Fisher       | 87785                 |
| jetPRIME transfection reagent              | VWR                 | 114-07                |
| PageRuler™ Plus Prestained Protein Ladder  | Thermo Fisher       | 26620                 |
| Clarity Western ECL Substrate              | Bio-rad             | 170-5060              |
| QIAGEN Plasmid MIDI Kit                    | QIAGEN              | 12143                 |
| PureLink™ Quick Plasmid Miniprep Kit       | Invitrogen          | K210011               |
| Pierce™ Anti-HA Magnetic Beads             | Thermo/MBSC         | 88836                 |
| PageRuler™ Plus Prestained Protein Ladder  | Thermo/MBSC         | 26619                 |
| TRIzol™ Reagent                            | Life technologies   | 15596018              |
| cDNA Reverse Transcription Kit             | Thermo Fisher       | 4368814               |
| Subcloning Efficiency DH5α Competent Cells | Thermo Fisher       | 18265017              |

|                                      |               |             |
|--------------------------------------|---------------|-------------|
| DL-Dithiothreitol                    | Sigma/MBSC    | D0632-25G   |
| Ampicillin sodium salt               | Sigma/MBSC    | a9518-5g    |
| SYBR SAFE DNA GEL STAIN              | Thermo/MBSC   | S33102      |
| Restore WB Stripping buffer          | VWR           | PI21059     |
| Perfecta SYBR Green FastMix Low Rox  | VWR           | 101414-286  |
| Halt™ Protease Inhibitor Cocktail    | Thermo Fisher | 87785       |
| Rat PDGF-BB Recombinant Protein      | Thermo Fisher | 520BB050    |
| Puromycin Dihydrochloride            | Gibco/MBSC    | A1113803    |
| Hematoxyline                         | Sigma         | MHS16-500ml |
| Formaldehyde solution 37% stabilized | VWR           | JT2106-4    |
| Salmon Sperm DNA, Sonicated          | VWR           | 10639-332   |
| Proteinase K, Biotechnology Grade    | VWR           | 97062-238   |
| GLYCOGEN SOLUTION, 20 MG/ML          | VWR           | 97063-256   |
| Lithium chloride, anhydrous ≥99.995% | VWR           | BT138730-5G |
| 10XTris/Glysin buffer                | Bio-Rad       | 161-0771    |
| 10XTris/Glysin/SDS buffer            | Bio-Rad       | 161-0772    |
| Pierce RIPA BUFFER                   | Thermo Fisher | 89901       |

|                                   |                   |             |
|-----------------------------------|-------------------|-------------|
| Olinone                           | Sigma             | SML1303-5MG |
| RVX208                            | Apexbio           | B1499       |
| Trichostatin A                    | Sigma             | T8552       |
| (+)-JQ1                           | Apexbio           | A1910       |
| Antibody diluent reagent solution | life technologies | 003218      |

**Table S2. siRNA, shRNA, and sgRNA sequences for mouse and rat genes**

|                    |                                                                        |
|--------------------|------------------------------------------------------------------------|
| Scrambled siRNA    | ThermoFisher Assay ID#s63864, sequence information kept by the company |
| Mouse CEBPD siRNA  | UUAGUAGAAAGGCACAUAGCT                                                  |
| Scrambled shRNA    | CCGGTAGCGACTAAACACATCAATCCTCGAGGATTGATGTGTTTAGTC<br>GCTATTTTTG         |
|                    | AATTCAAAAATAGCGACTAAACACATCAATCCTCGAGGATTGATGTGTT<br>TAGTCGCTA         |
| Mouse BRD2 shRNA#1 | CCGGCAGCCCAAGAAATCTAAGAACTCGAGTTTCTTAGATTTCTTGGG<br>CTGTTTTTG          |
|                    | AATTCAAAAACAGCCCAAGAAATCTAAGAACTCGAGTTTCTTAGATTT<br>CTTGGGCTG          |
| Mouse BRD2 shRNA#2 | CCGGCCTCAGAATGTATGCAGGATTCTCGAGAATCCTGCATACATTCT<br>GAGGTTTTTG         |
|                    | AATTCAAAAACCTCAGAATGTATGCAGGATTCTCGAGAATCCTGCATAC<br>ATTCTGAGG         |
| Mouse BRD3 shRNA#1 | CCGGAGCTGAACCTGCCTGATTATCCTCGAGGATAATCAGGCAGGTTC<br>AGCTTTTTTG         |
|                    | AATTCAAAAAAGCTGAACCTGCCTGATTATCCTCGAGGATAATCAGGCA<br>GGTTCAGCT         |
| Mouse BRD3 shRNA#2 | CCGGCCACAGATGATATAGTGCTAACTCGAGTTAGCACTATATCATCTG<br>TGTTTTTG          |
|                    | AATTCAAAAACCACAGATGATATAGTGCTAACTCGAGTTAGCACTATAT<br>CATCTGTGG         |
| Mouse BRD4 shRNA#1 | CCGGGCCATCTACACTACGAGAGTTCTCGAGAACTCTCGTAGTGTAGA<br>TGGCTTTTTG         |

|                                    |                                                                    |
|------------------------------------|--------------------------------------------------------------------|
|                                    | AATTCAAAAAGCCATCTACACTACGAGAGTTCTCGAGAACTCTCGTAGT<br>GTAGATGGC     |
| Mouse BRD4<br>shRNA#2              | CCGGGATGTGTTTCAAATGCGCTTTCTCGAGAAAGCGCATTTC<br>AAACA<br>CATCTTTTGG |
|                                    | AATTCAAAAAGATGTGTTTCAAATGCGCTTTCTCGAGAAAGCGCATTTC<br>AAACACATC     |
| sgRNAs for<br>enhancer<br>deletion | GGAGAAACGCACCGCGGTTAGGG                                            |
|                                    | CTCTCGTCGTCGTACATGGCAGG                                            |

**Table S3. Antibodies**

| Antigen        | Manufacturer | Catalog Number | Dilution Ratio | Application  |
|----------------|--------------|----------------|----------------|--------------|
| BRD2           | Proteintech  | 22236-1-AP     | 1:1000         | Western Blot |
| BRD3           | Proteintech  | 11859-1-AP     | 1:1000         | Western Blot |
| BRD4           | Abcam        | ab128874       | 1:1000         | Western Blot |
| $\beta$ -actin | Proteintech  | 66009-1-Ig     | 1:5000         | Western Blot |
| HA             | Proteintech  | 51064-2-AP     | 1:5000         | Western Blot |
| Flag           | Sigma        | F3165-2MG      | 1:5000         | Western Blot |
| CEBPD          | Abcam        | ab198230       | 1:100          | IF           |
| CEBPD          | Santa cruz   | Sc-515028      | 1:100          | Western Blot |
| PDGFR $\alpha$ | CST          | 3164S          | 1:1000         | Western Blot |
| PDGFR $\beta$  | CST          | 4564           | 1:1000         | Western Blot |

|                                           |         |          |        |              |
|-------------------------------------------|---------|----------|--------|--------------|
| Goat anti-mouse (H+L) HRP-conjugated IgG  | Bio-Rad | 170-6516 | 1:3000 | Western Blot |
| Goat anti-rabbit (H+L) HRP-conjugated IgG | Bio-Rad | 170-6516 | 1:3000 | Western Blot |

**Table S4. Primer sequences for mouse genes**

|                               |                                  |
|-------------------------------|----------------------------------|
| Mouse GAPDH                   | Forward: AAGGTCGGTGTGAACGGATT    |
|                               | Reverse: CTTTGTCAACAAGAGAAGGCAGC |
| Mouse BRD2                    | Forward: AATGGCTTCTGTACCAGCTTTAC |
|                               | Reverse: CTGGCTTTTTGGGATTGGACA   |
| Mouse BRD3                    | Forward: AAAAAGGCTCCCACCAAGAAG   |
|                               | Reverse: TGTC AAGGCTAAGTTGTCGCT  |
| Mouse BRD4                    | Forward: AGTGTCTTTGACCCTATTAGCCA |
|                               | Reverse: CATGCTGGTTGAGATGGGG     |
| Mouse CEBPD                   | Forward: CGACTTCAGCGCCTACATTGA   |
|                               | Reverse: CTAGCGACAGACCCACAC      |
| Mouse PDGFR $\alpha$          | Forward: TCCATGCTAGACTCAGAAGTCA  |
|                               | Reverse: TCCCGGTGGACACAATTTTTTC  |
| Mouse IL1-beta                | Forward: GCAACTGTTCTGAACTCAACT   |
|                               | Reverse: ATCTTTTGGGGTCCGTCAACT   |
| Mouse IL-6                    | Forward: CTGCAAGAGACTTCCATCCAG   |
|                               | Reverse: AGTGGTATAGACAGGTCTGTTGG |
| mouse MCP-1                   | Forward: TTAAAAACCTGGATCGGAACCAA |
|                               | Reverse: GCATTAGCTTCAGATTTACGGGT |
| Mouse PDGFR $\beta$           | Forward: CAAGAAGCGGCCATGAATCAG   |
|                               | Reverse: CGGCCCTAGTGAGTTGTTGT    |
| Mouse PDGFR $\beta$ promoter  | Forward: CCCACCCCGGCCTTTTATA     |
|                               | Reverse: AGGGCGGCAATTTGTCTCC     |
| Mouse PDGFR $\alpha$ promoter | Forward: CTTGGCCTGTTGCTGTCTTAG   |
|                               | Reverse: ACTCTGTTCTCGCTGCTCGTA   |
| Mouse CEBPD enhancer          | Forward: TAGTTCTGGTCTCGTGGCGG    |
|                               | Reverse: TTCCTGTTTGTGCGGTTTGG    |
| Mouse CEBPD promoter          | Forward: TGTTCCGCCTTTGCTATGT     |
|                               | Reverse: CCTTCCCTCCTTCTGTTT      |
| Human CEBPD promoter          | Forward: TCCGTAGACCTGGAAGAAAC    |
|                               | Reverse: CAAAAGCAGAGCAGATGGG     |
